# Supplementary material for: Stereoisomeric Tris-BINOL-Menthol Bulky Monophosphites: Synthesis, Characterisation and Application in Rhodium-Catalysed Hydroformylation
Source: MDPI journal article supplement (doi:10.3390/molecules27061989), 2022-03-19
Supplement: s1 [file s1]

## Supplementary material

for

### **Stereoisomeric Tris-BINOL-Menthol Bulky Monophosphites: Synthesis, Characterisation and Application in Rhodium-Catalysed Cydroformylation**

Alexandre P. Felgueiras,<sup>a,†</sup> Fábio M. S. Rodrigues,<sup>a,†</sup> Rui M. B. Carrilho,<sup>a,\*</sup> Pedro F. Cruz,<sup>a</sup>  
Vitor H. Rodrigues,<sup>b</sup> Tamás Kégl,<sup>c</sup> László Kollár<sup>c</sup> and Mariette M. Pereira <sup>a,\*</sup>

<sup>a</sup> *Coimbra Chemistry Centre, Department of Chemistry, University of Coimbra, Rua Larga, 3004-535, Coimbra, Portugal*

<sup>b</sup> *Centre for Physics of the University of Coimbra, Department of Physics, University of Coimbra, Portugal*

<sup>c</sup> *Department of Inorganic Chemistry and ELKH-PTE Research Group for Selective Chemical Syntheses, University of Pécs, H-7622 Pécs, Hungary*

#### **Index**

|                                 |            |
|---------------------------------|------------|
| <b>1. NMR and HRMS spectra</b>  | <b>S2</b>  |
| <b>2. Crystallographic data</b> | <b>S18</b> |

## 1. NMR and HRMS spectra

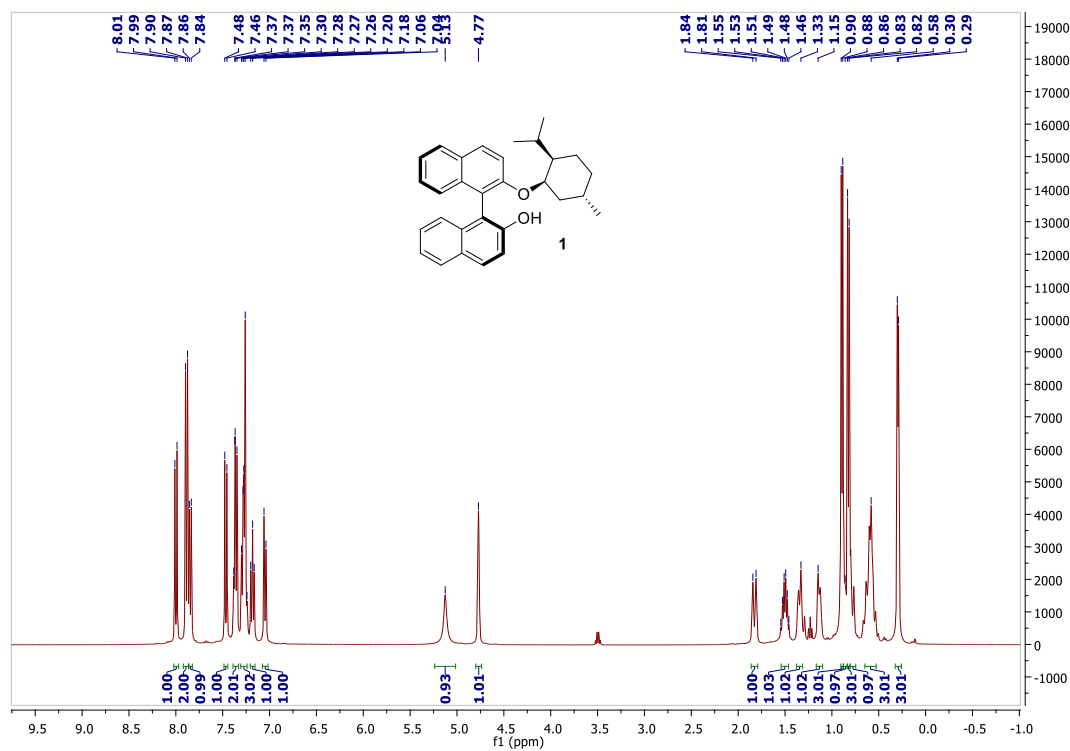

**Figure S1.**  $^1\text{H}$  NMR spectrum of (S)-BINOL-(-)-neomenthol (**1**) in  $\text{CDCl}_3$ .

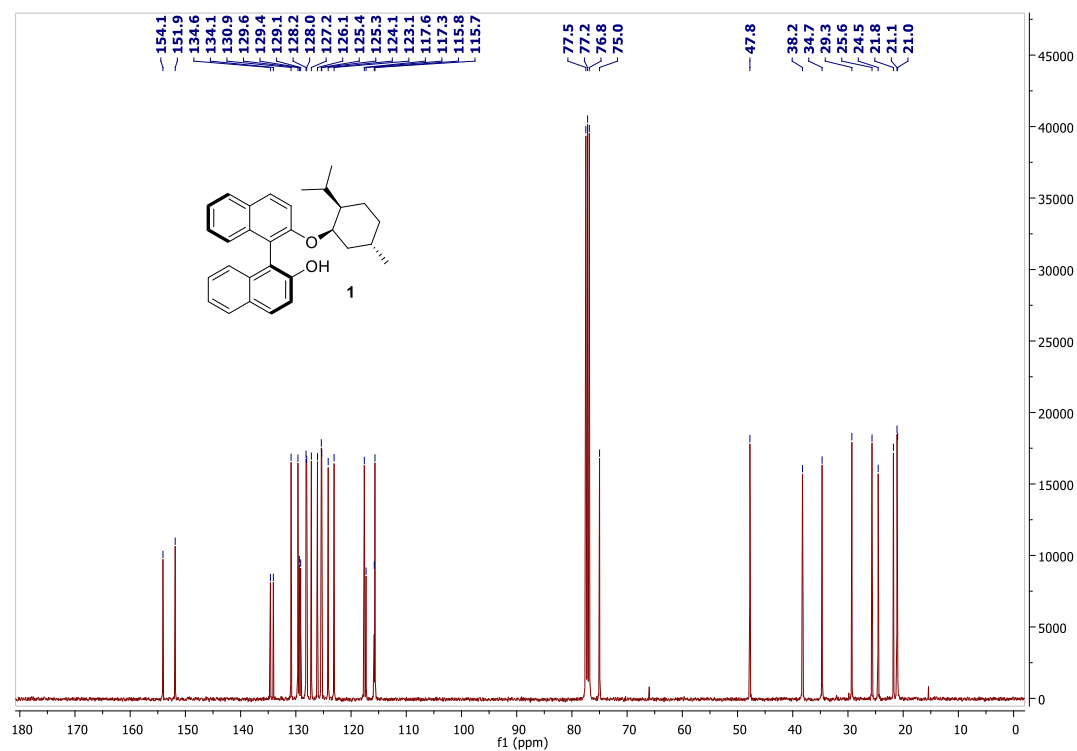

**Figure S2.**  $^{13}\text{C}$  NMR spectrum of (S)-BINOL-(-)-neomenthol (**1**) in  $\text{CDCl}_3$ .

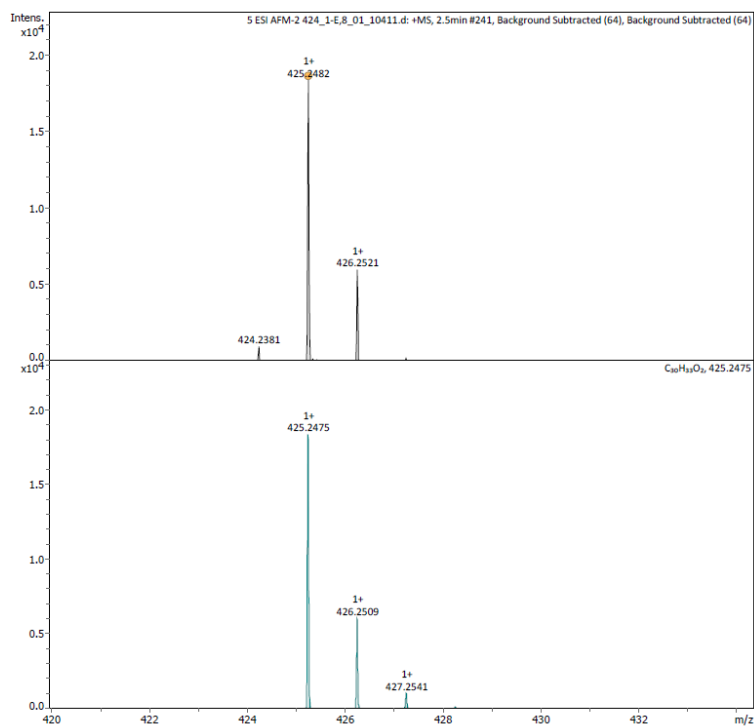

**Figure S3.** HRMS spectrum of (*S*)-BINOL-(-)-neomenthol (**1**).

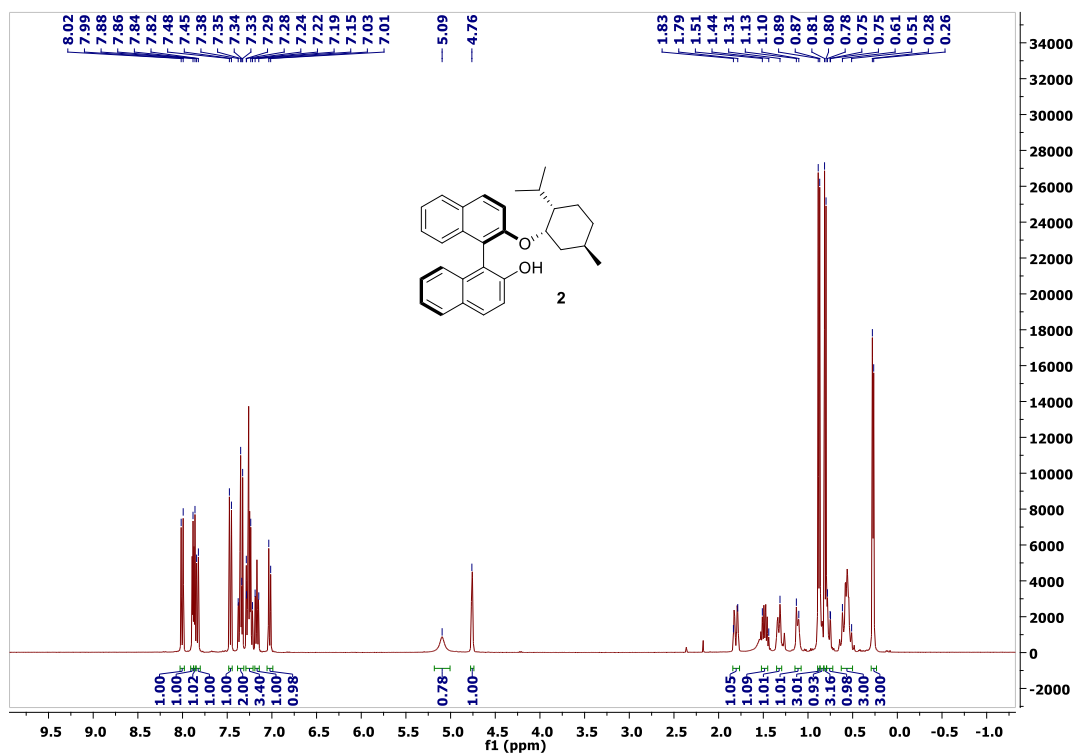

**Figure S4.**  $^1\text{H}$  NMR spectrum of (*R*)-BINOL-(+)-neomenthol (**2**) in  $\text{CDCl}_3$ .

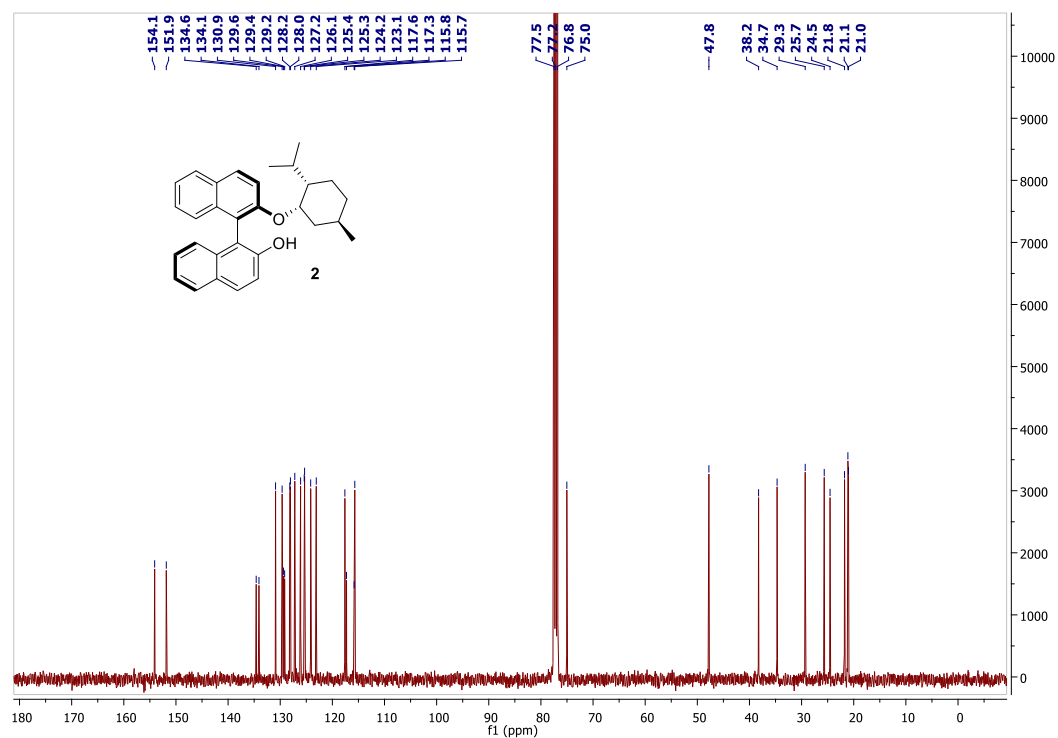

**Figure S5.** <sup>13</sup>C NMR spectrum of (R)-BINOL-(+)-neomenthol (2) in CDCl<sub>3</sub>.

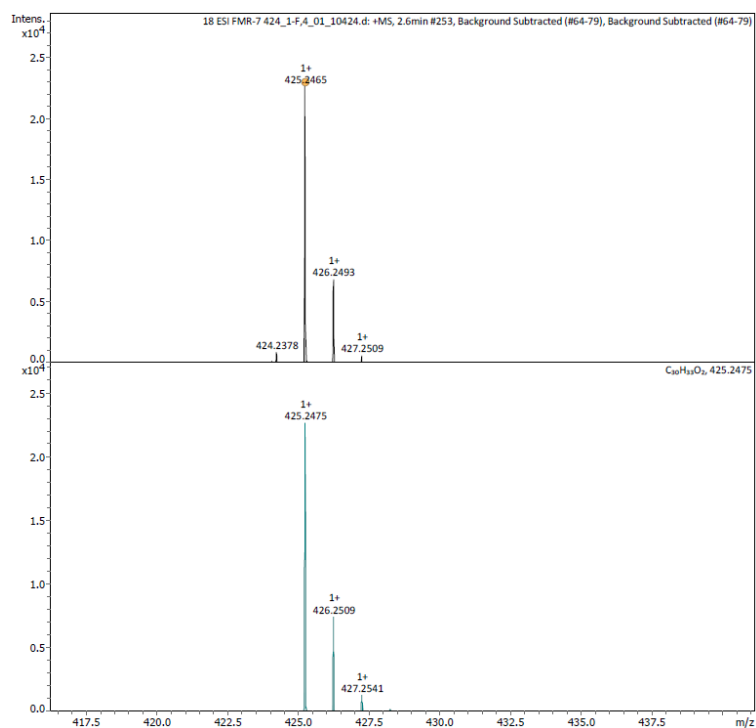

**Figure S6.** HRMS spectrum of (R)-BINOL-(+)-neomenthol (2).

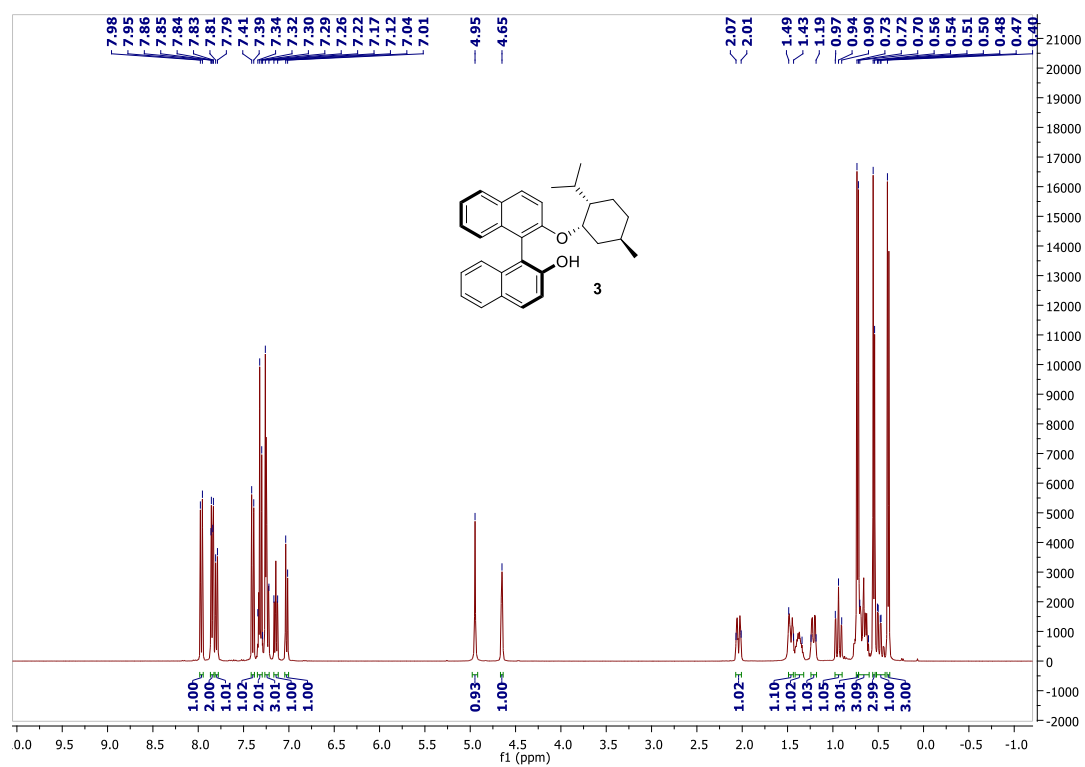

**Figure S7.** <sup>1</sup>H NMR spectrum of (S)-BINOL-(+)-neomenthol (**3**) in CDCl<sub>3</sub>.

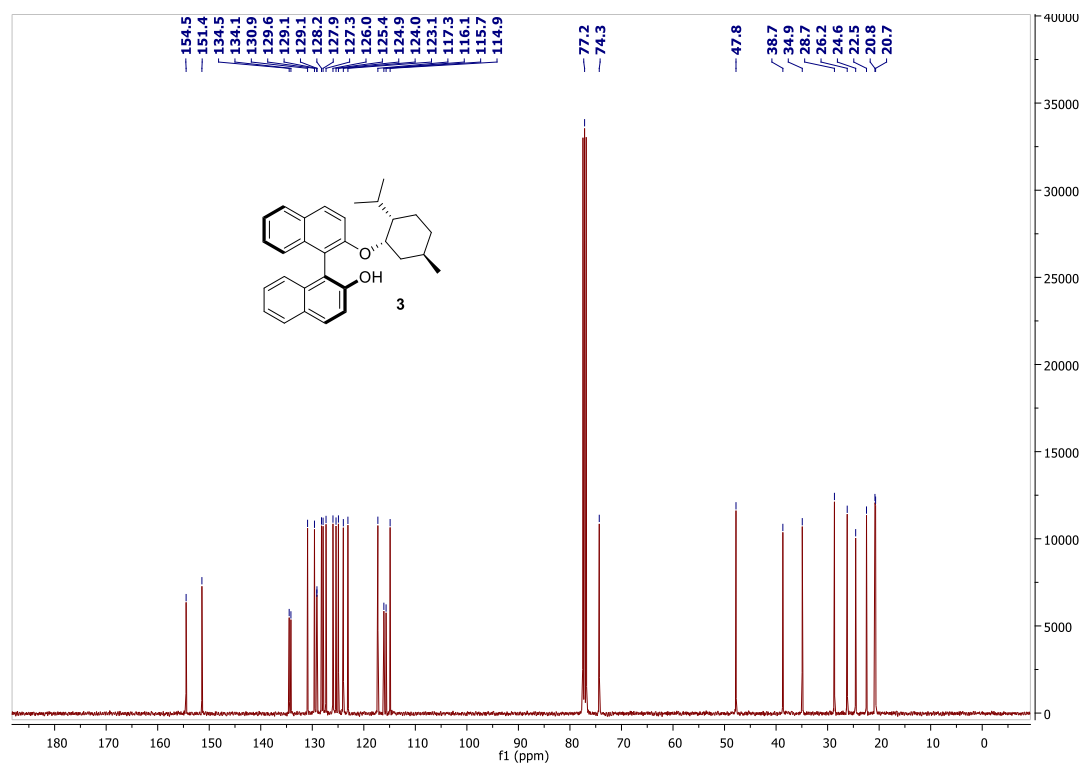

**Figure S8.** <sup>13</sup>C NMR spectrum of (S)-BINOL-(+)-neomenthol (**3**) in CDCl<sub>3</sub>.

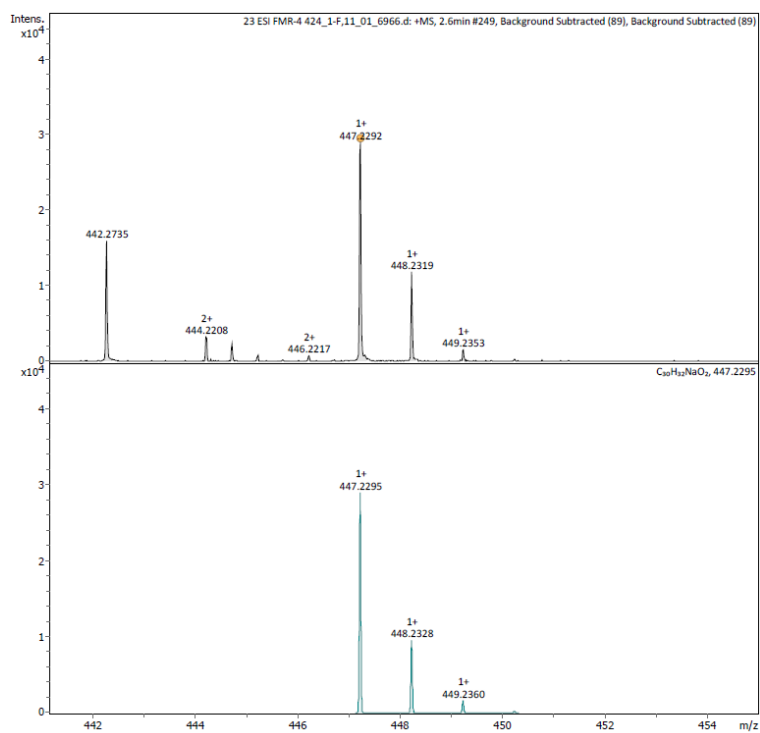

**Figure S9.** HRMS spectrum of (S)-BINOL-(+)-neomenthol (**3**).

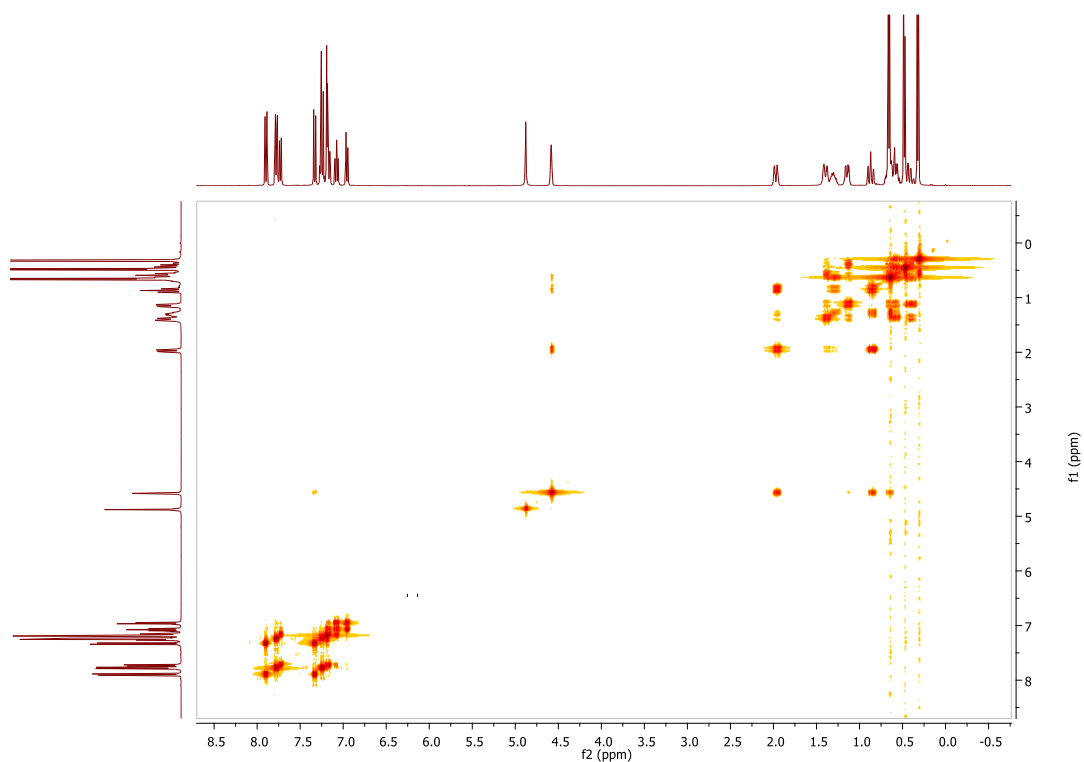

**Figure S10.** COSY spectrum of (S)-BINOL-(+)-neomenthol (**3**) in  $CDCl_3$ .

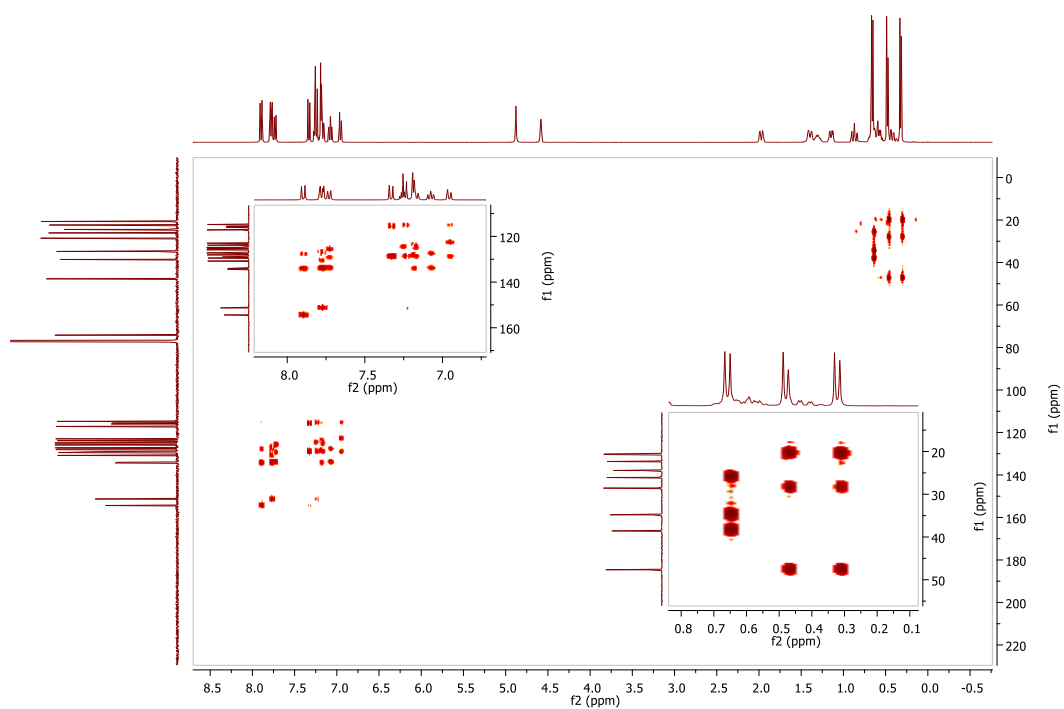

**Figure S11.** HMBC spectrum of (*S*)-BINOL-(+)-neomenthol (**3**) in CDCl<sub>3</sub>.

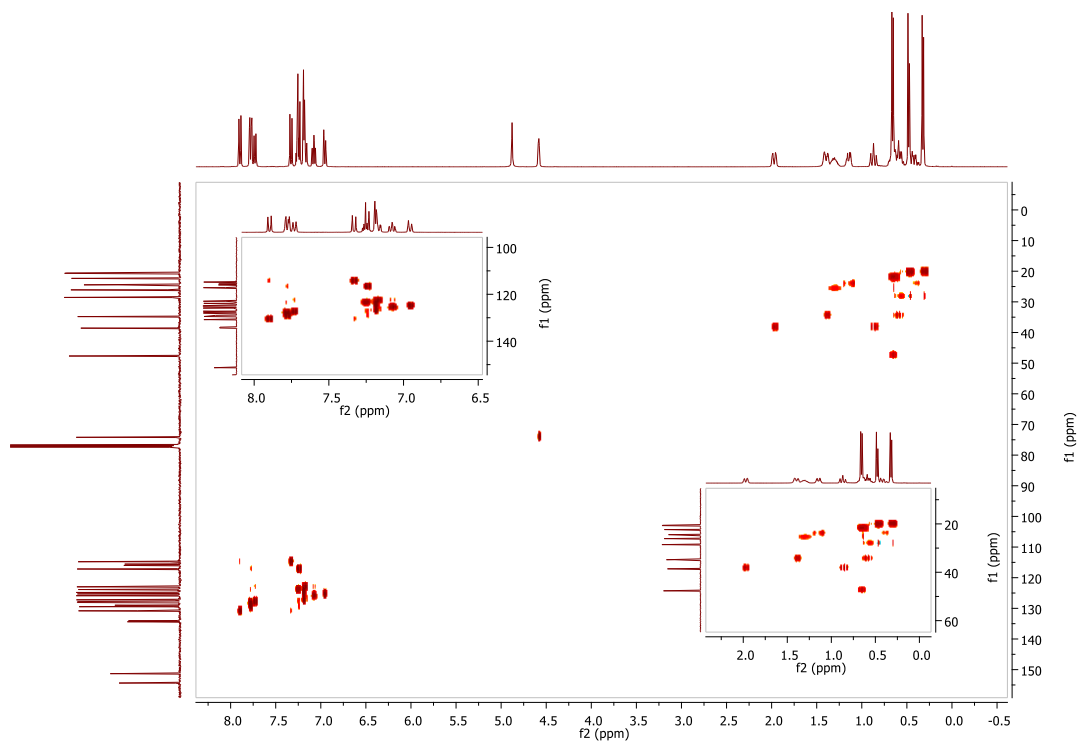

**Figure S12.** HSQC spectrum of (*S*)-BINOL-(+)-neomenthol (**3**) in CDCl<sub>3</sub>.

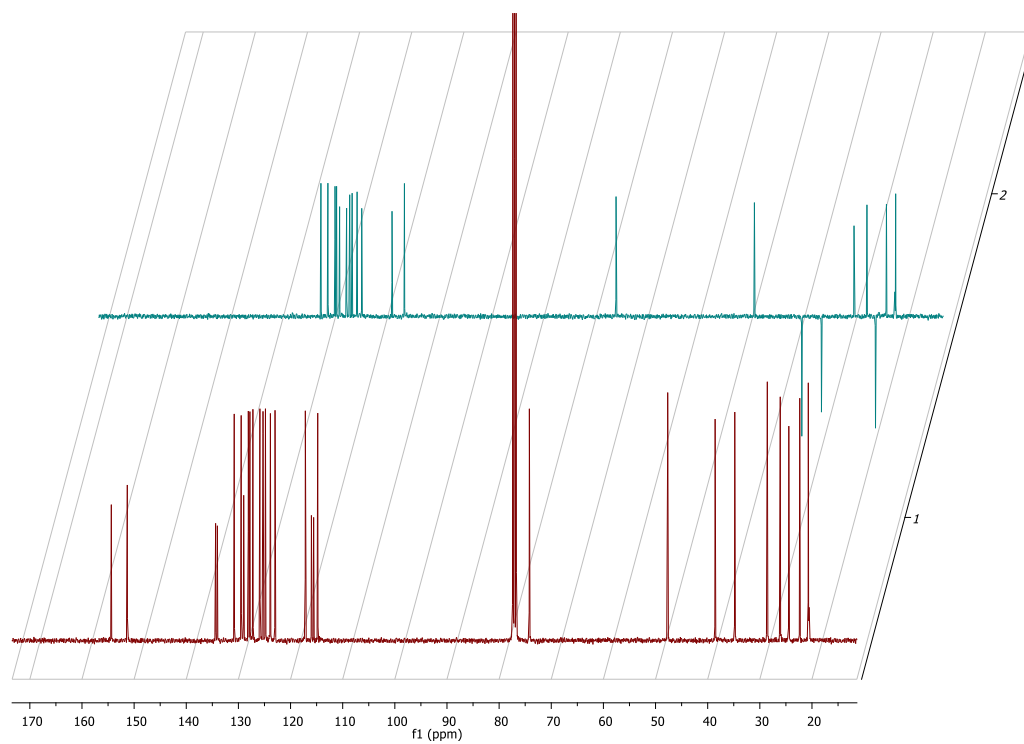

**Figure S13.** <sup>13</sup>C NMR (1) and DEPT 135 (2) spectra of (*S*)-BINOL-(+)-neomenthol (**3**) in CDCl<sub>3</sub>.



**Table S1.**  $^1\text{H}$  and  $^{13}\text{C}$  NMR assignments for **3**.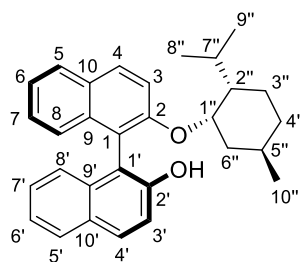

| Position | $^1\text{H}$ NMR / ppm | $^{13}\text{C}$ NMR / ppm |
|----------|------------------------|---------------------------|
| 1''      | 4.65                   | 74.3                      |
| 2''      | 0.69                   | 47.8                      |
| 3''      | 1.22; 0.48             | 24.6                      |
| 4''      | 1.46; 0.67             | 34.9                      |
| 5''      | 1.38                   | 26.2                      |
| 6''      | 2.04; 0.94             | 38.7                      |
| 7''      | 0.64                   | 28.7                      |
| 8''      | 0.55 or 0.40           | 20.7 or 20.8              |
| 9''      | 0.55 or 0.40           | 20.7 or 20.8              |
| 10''     | 0.72                   | 22.5                      |
| OH       | 4.95                   | -                         |
| 1        | *                      | 116.1                     |
| 2        | *                      | 154.5                     |
| 3        | 7.96                   | 130.9                     |
| 4        | 7.40                   | 114.9                     |
| 5        | 7.02                   | 125.4                     |
| 6        | 7.15                   | 126.0                     |
| 7        | 7.22                   | 123.1                     |
| 8        | 7.80                   | 127.9                     |
| 9        | *                      | 134.5                     |
| 10       | *                      | 129.1                     |
| 1'       | *                      | 115.7                     |
| 2'       | *                      | 151.4                     |
| 3'       | 7.84                   | 128.2                     |
| 4'       | 7.31                   | 117.3                     |
| 5'       | 7.25                   | 124.9                     |
| 6'       | 7.32                   | 124.0                     |
| 7'       | 7.25                   | 127.3                     |
| 8'       | 7.85                   | 129.6                     |
| 9'       | *                      | 134.1                     |
| 10'      | *                      | 129.1                     |

$^1\text{H}$  NMR chemical shifts are given as averaged ppm values. For further details, see the full spectra (Figure S7 – Figure S13).

\* quaternary C atoms.

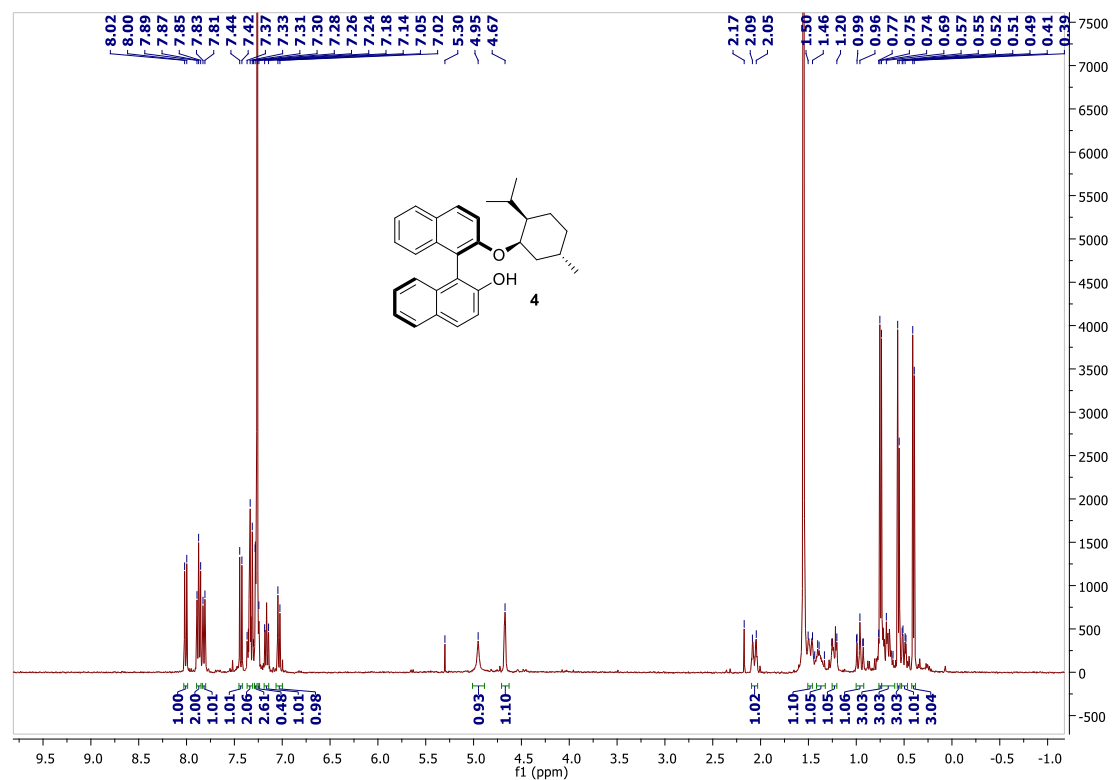

**Figure S14.** <sup>1</sup>H NMR spectrum of (R)-BINOL-(-)-neomenthol (**4**) in CDCl<sub>3</sub>.

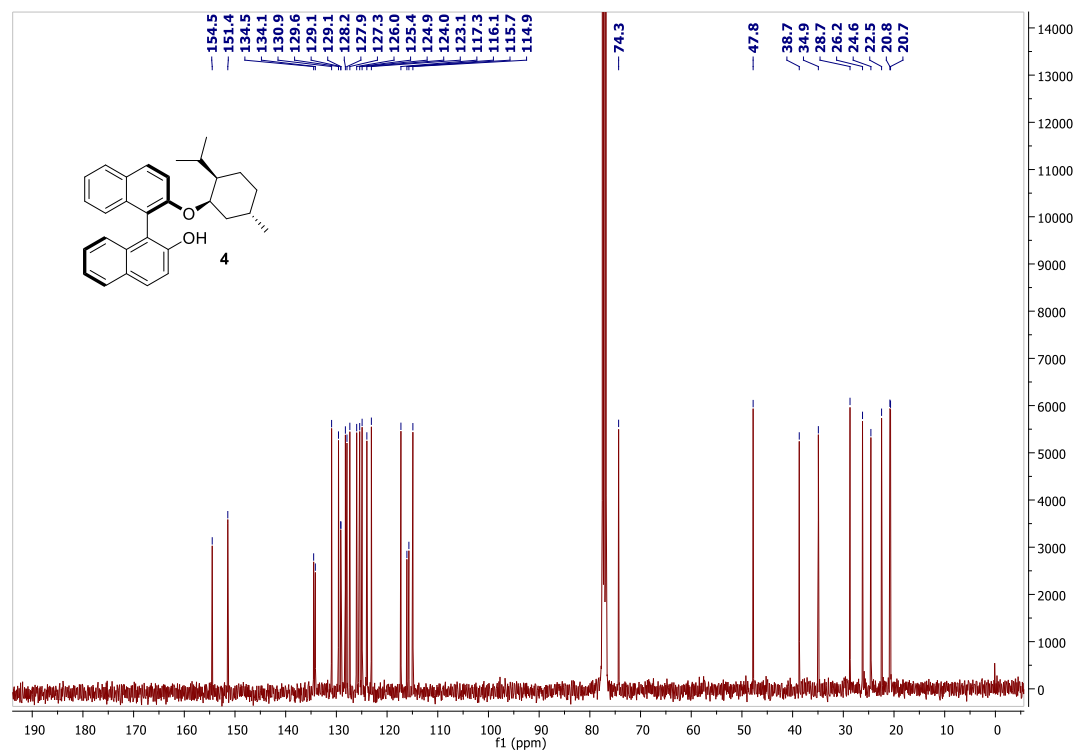

**Figure S15.** <sup>13</sup>C NMR spectrum of (R)-BINOL-(-)-neomenthol (**4**) in CDCl<sub>3</sub>.

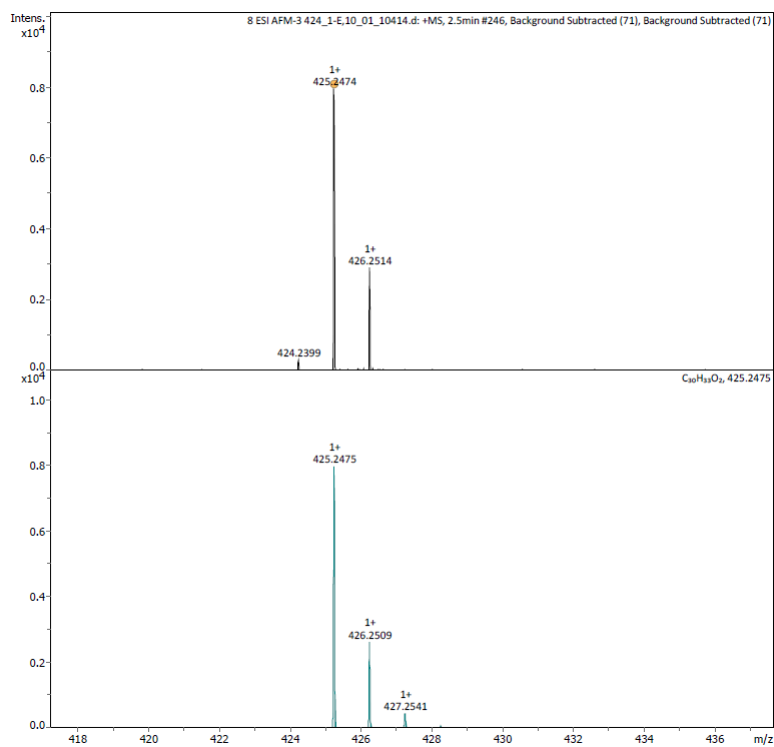

Figure S16. HRMS spectrum of (*R*)-BINOL-(–)-neomenthol (**4**).

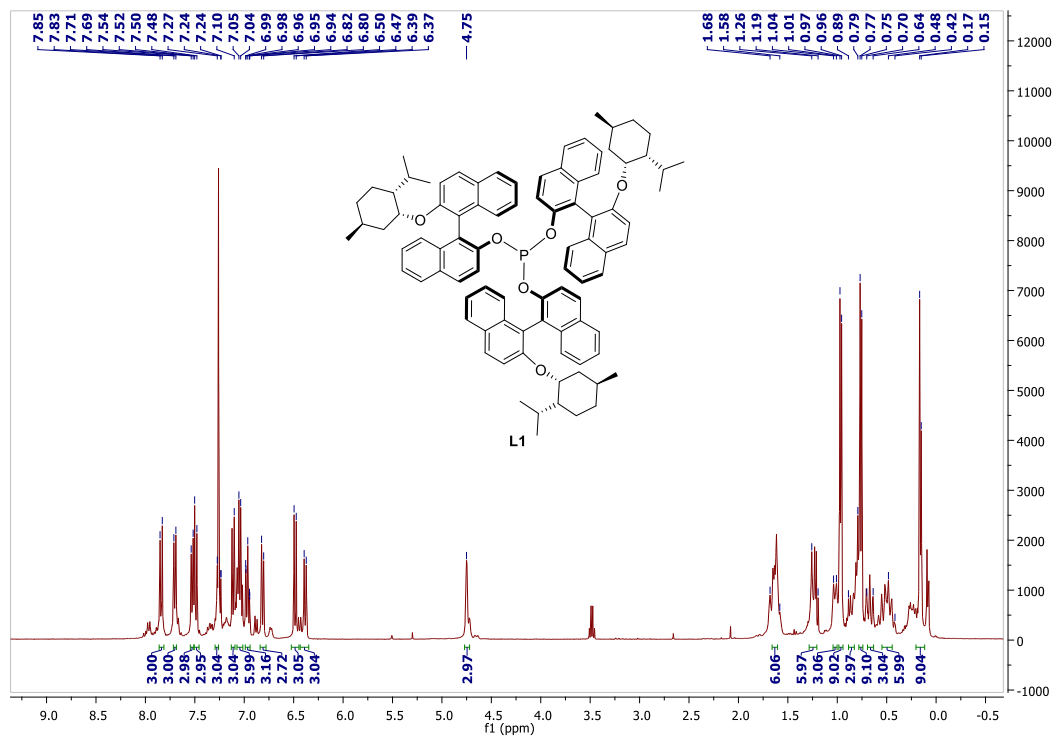

Figure S17.  $^1\text{H}$  NMR spectrum of **L1** in  $\text{CDCl}_3$ .

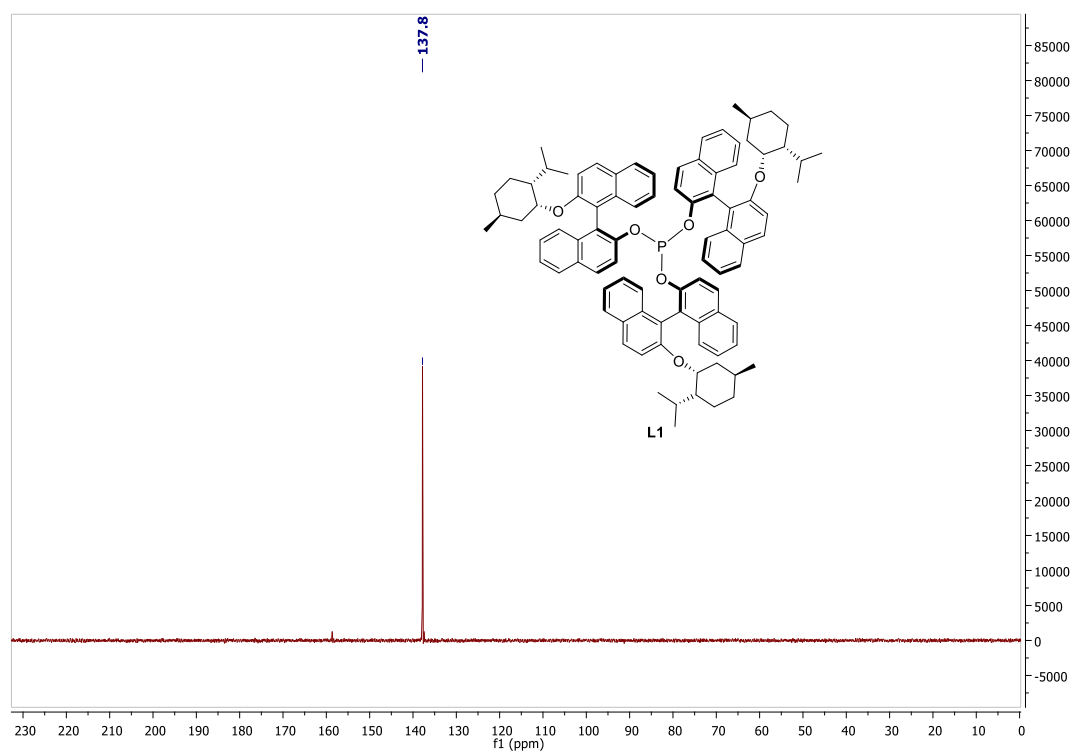

Figure S18. <sup>31</sup>P NMR spectrum of L1 in CDCl<sub>3</sub>.

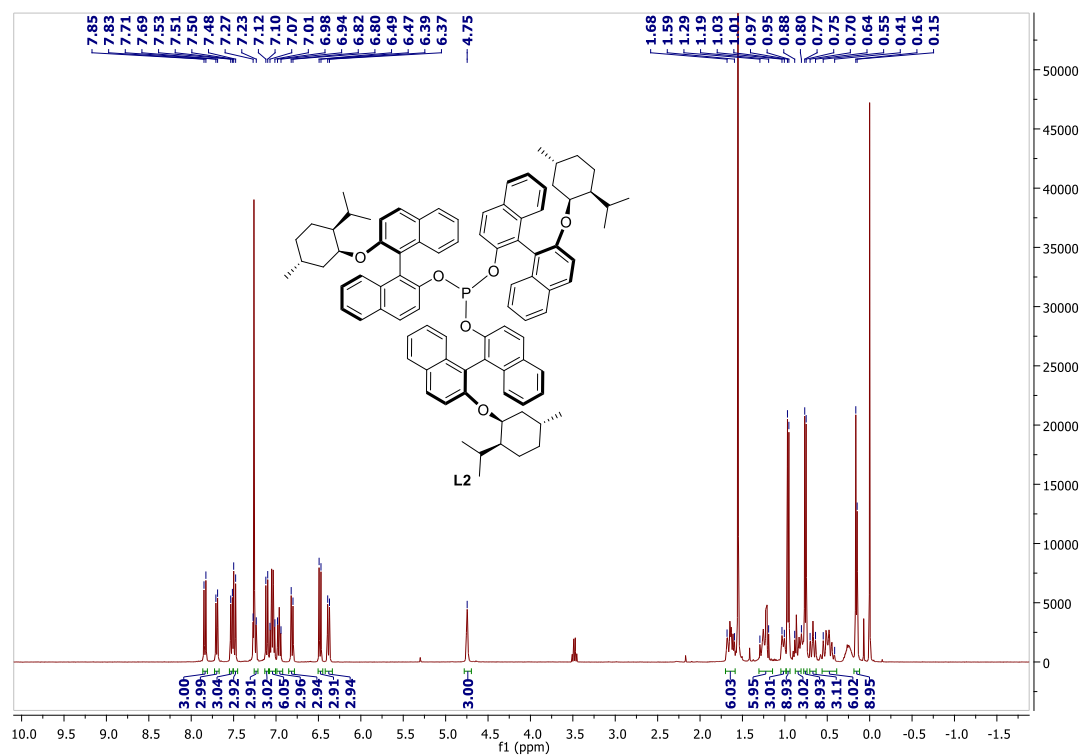

Figure S19. <sup>1</sup>H NMR spectrum of L2 in CDCl<sub>3</sub>.

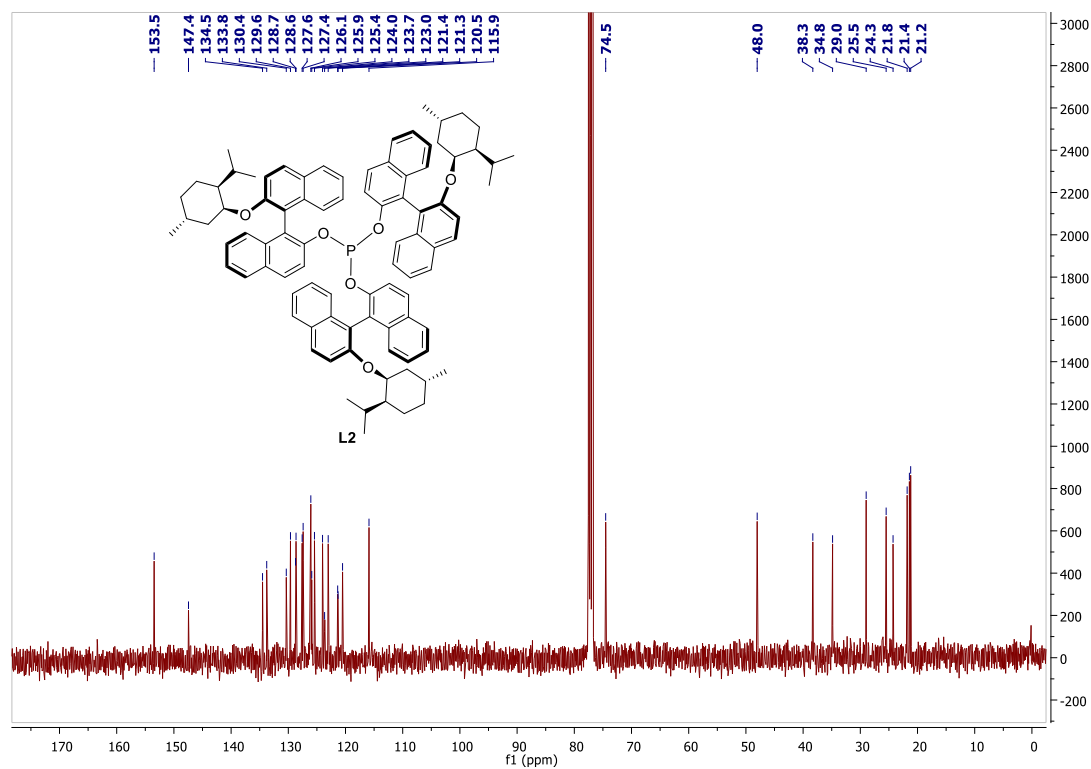

**Figure S20.** <sup>13</sup>C NMR spectrum of L2 in CDCl<sub>3</sub>.

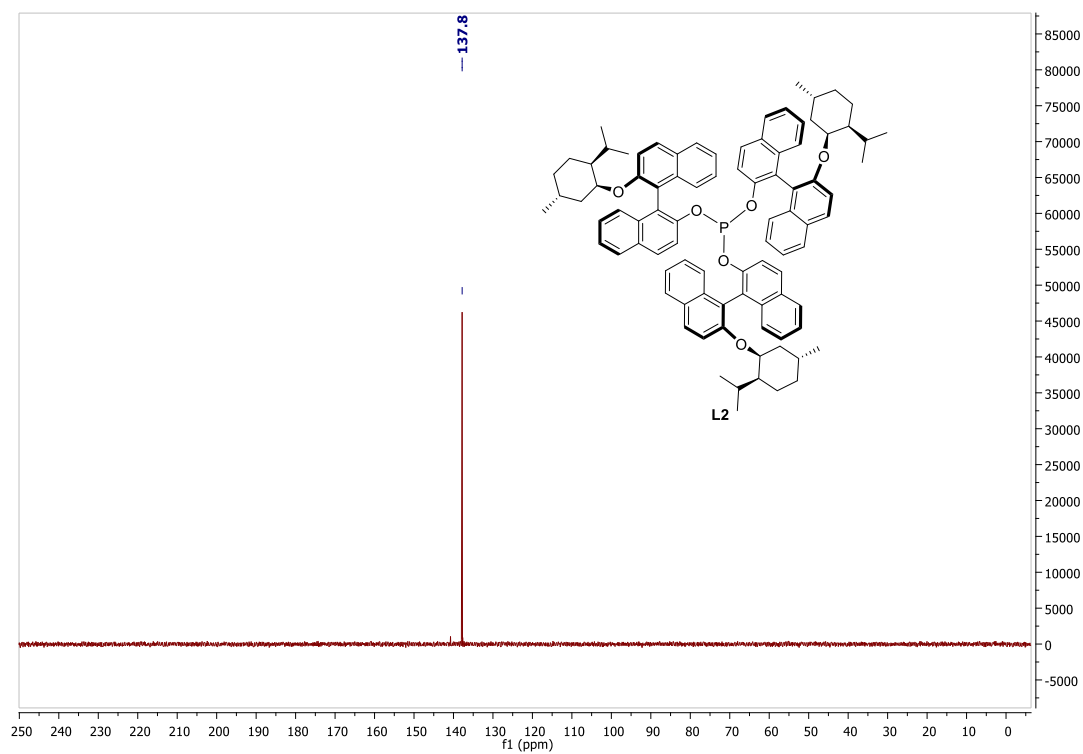

**Figure S21.** <sup>31</sup>P NMR spectrum of L2 in CDCl<sub>3</sub>.

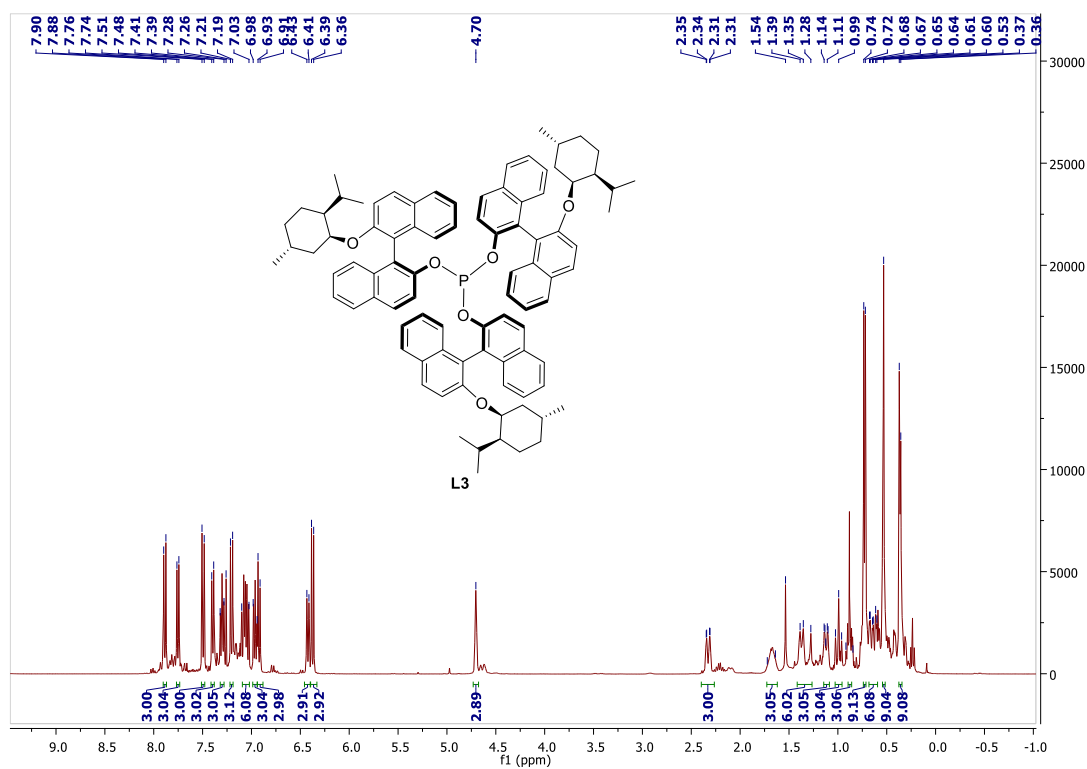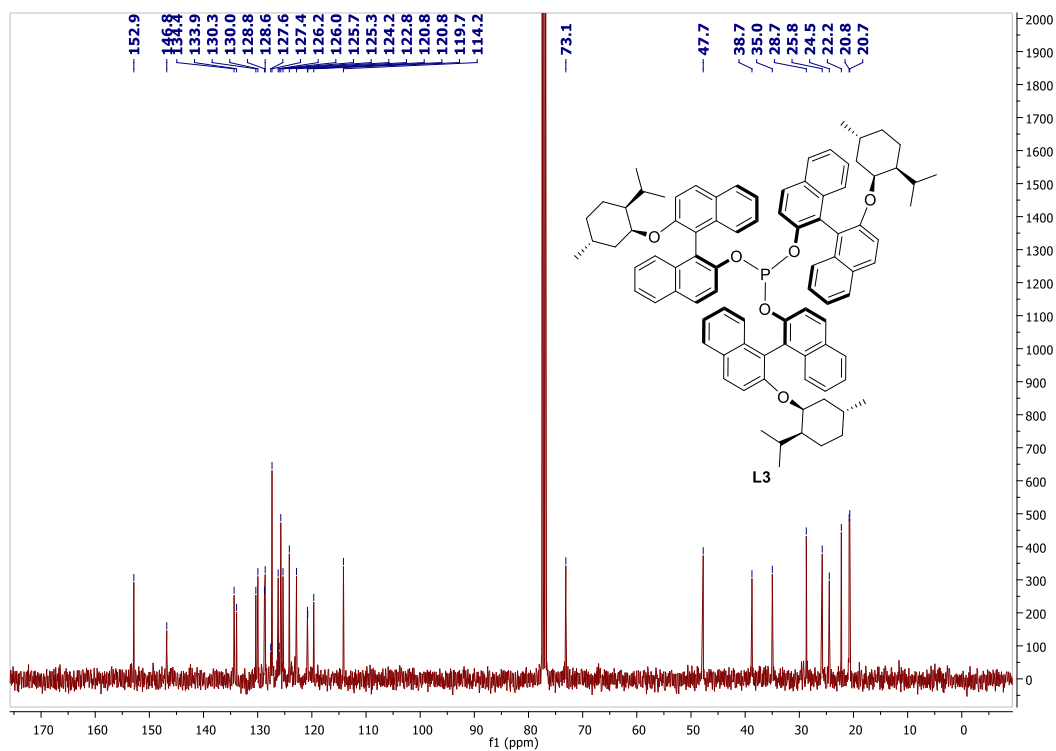

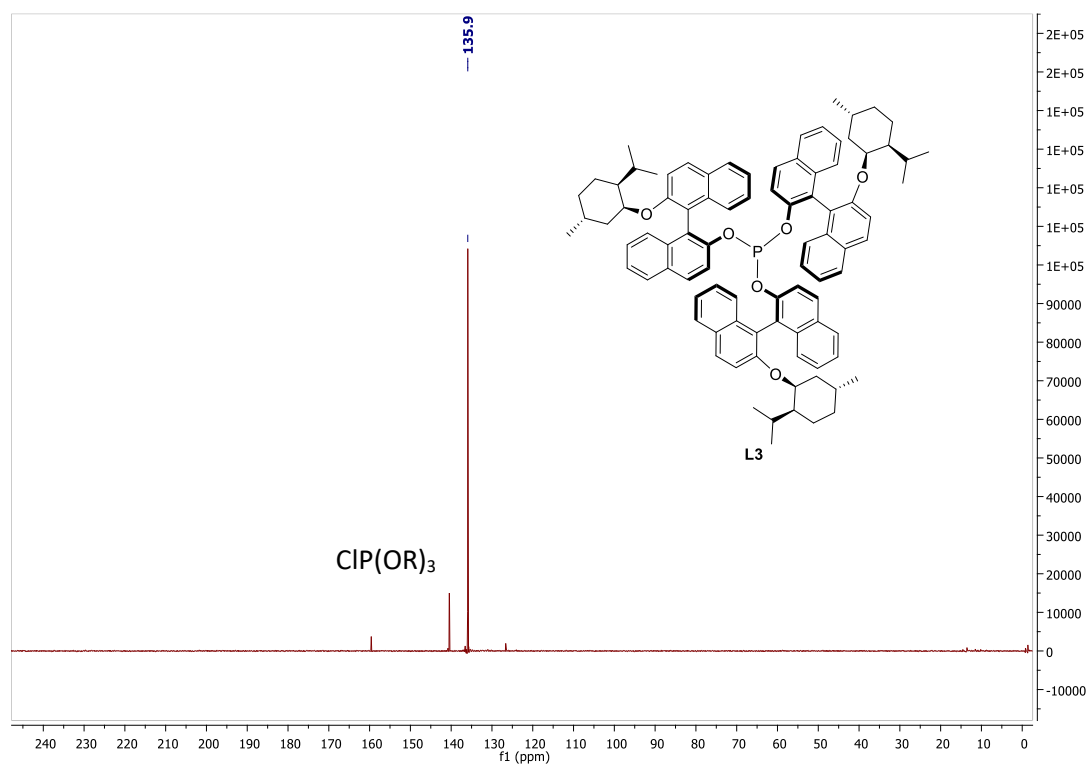

Figure S24.  $^{31}\text{P}$  NMR spectrum of L3 in  $\text{CDCl}_3$ .

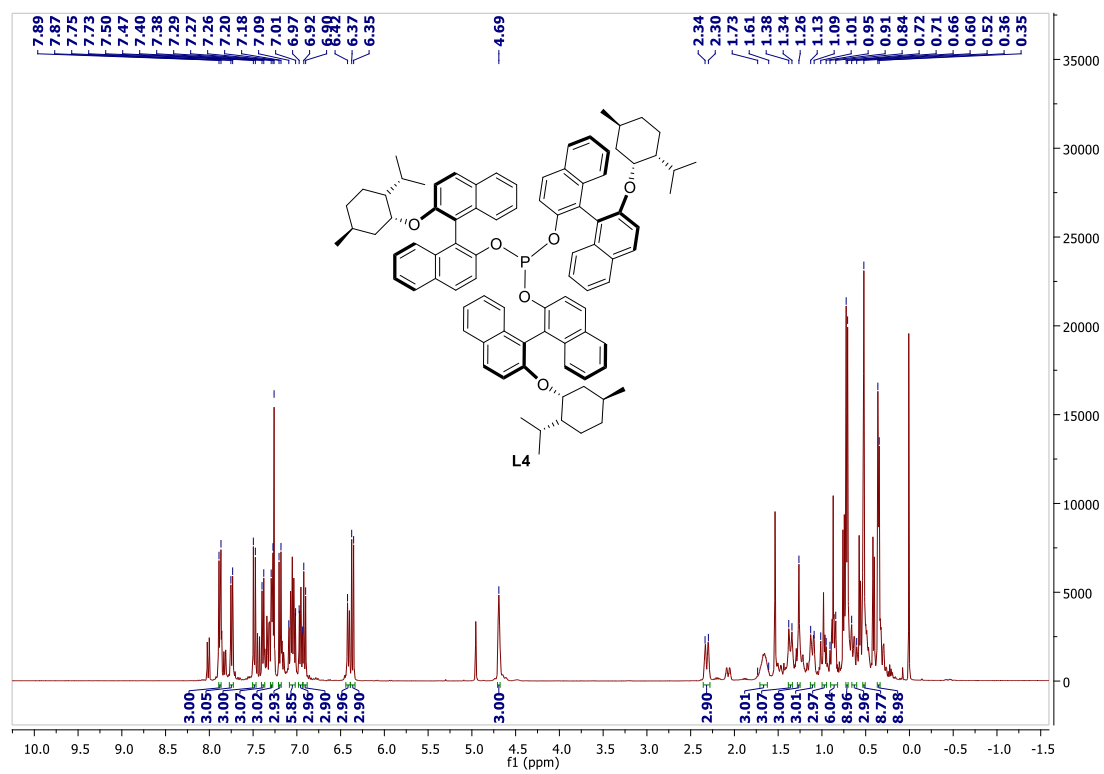

Figure S25.  $^1\text{H}$  NMR spectrum of L4 in  $\text{CDCl}_3$ .

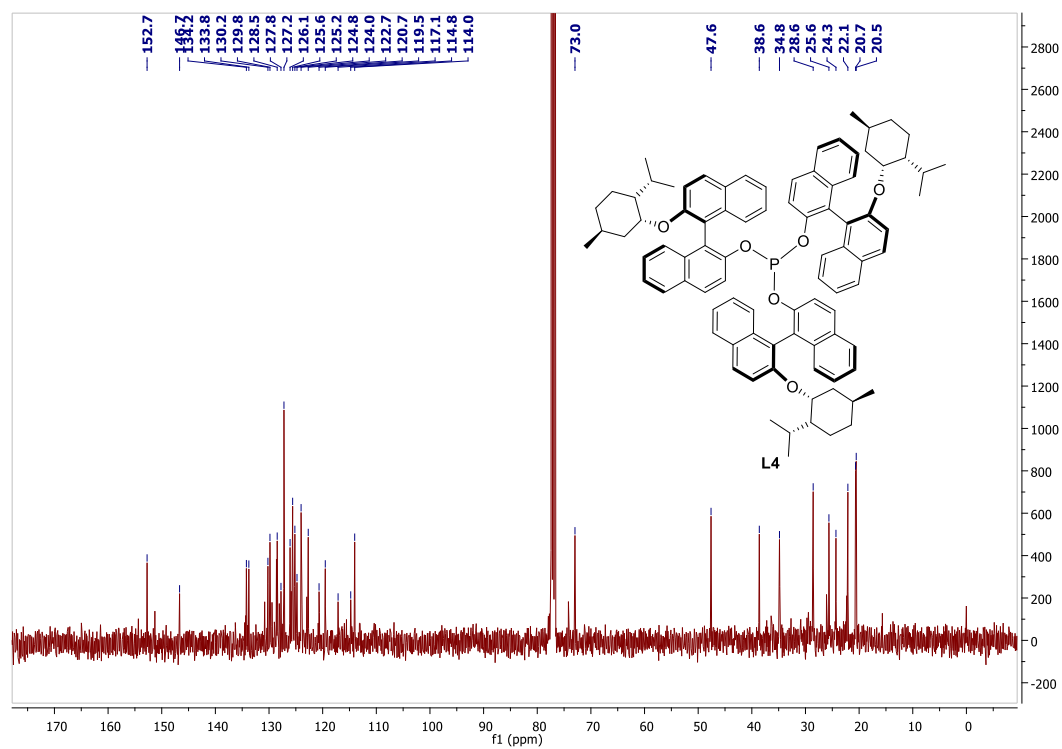

**Figure S26.**  $^{13}\text{C}$  NMR spectrum of L4 in  $\text{CDCl}_3$ .

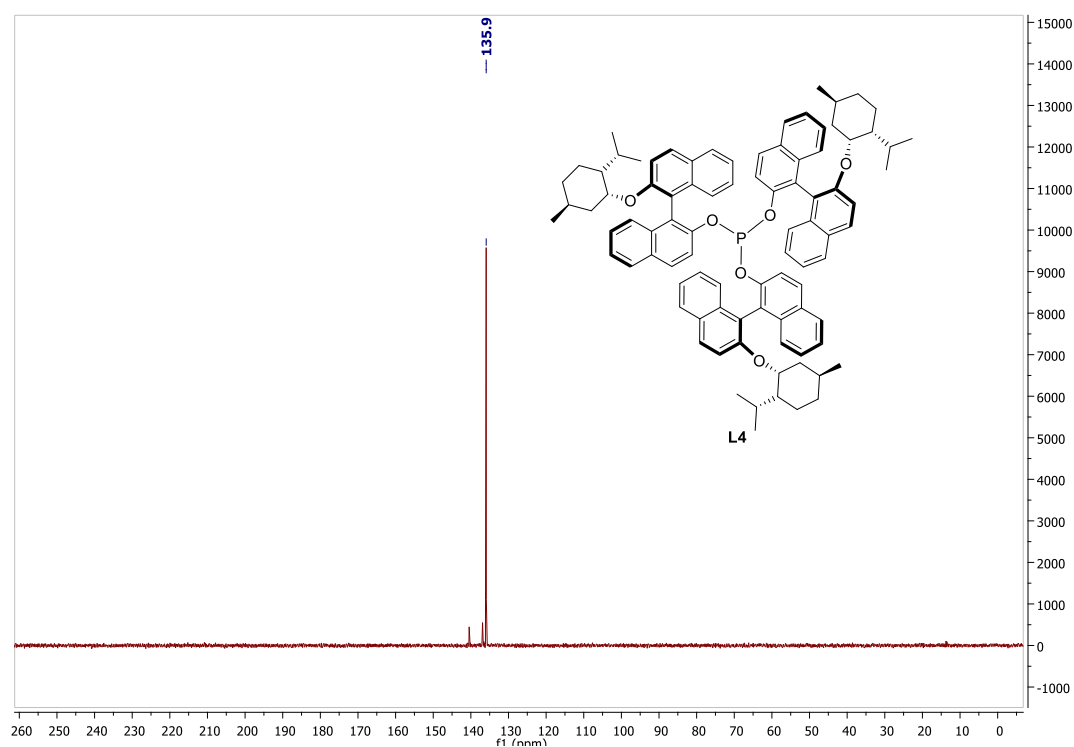

**Figure S27.**  $^{31}\text{P}$  NMR spectrum of L4 in  $\text{CDCl}_3$ .



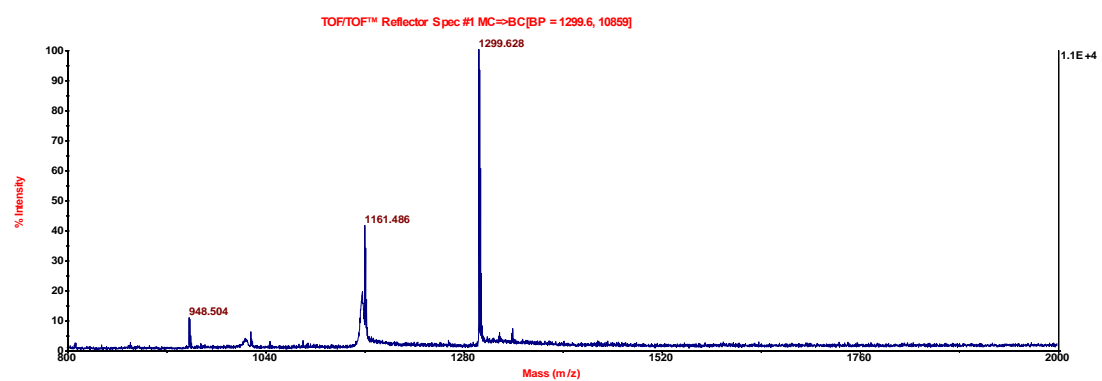

| Index | Centroid Mass | Lower Bound | Upper Bound | Charge (z) | Height  | Relative Intensity | Area    | S/N Ratio | Resolution | Isotope Cluster Area |
|-------|---------------|-------------|-------------|------------|---------|--------------------|---------|-----------|------------|----------------------|
| 1     | 948,50360     | 948,26000   | 948,81000   | 1          | 1175,0  | 10,8               | 8537,6  | 44,2      | 10006,6    | 14020,7              |
| 2     | 1161,48584    | 1161,31000  | 1161,80000  | 1          | 4378,0  | 40,3               | 26380,0 | 79,3      | 11505,3    | 55685,3              |
| 3     | 1299,62793    | 1299,05000  | 1299,96000  | 1          | 10583,0 | 97,5               | 94469,7 | 225,6     | 9643,6     | 223307,5             |

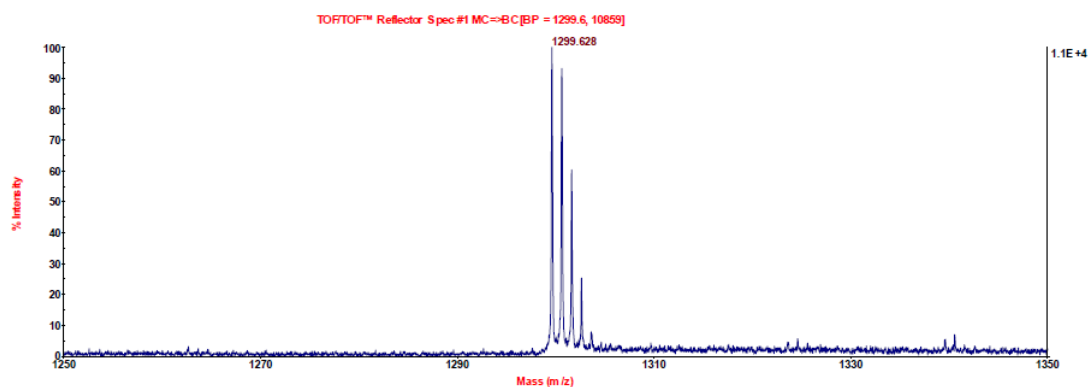

Figure S28. HRMS (MALDI-TOF) spectrum of L4.

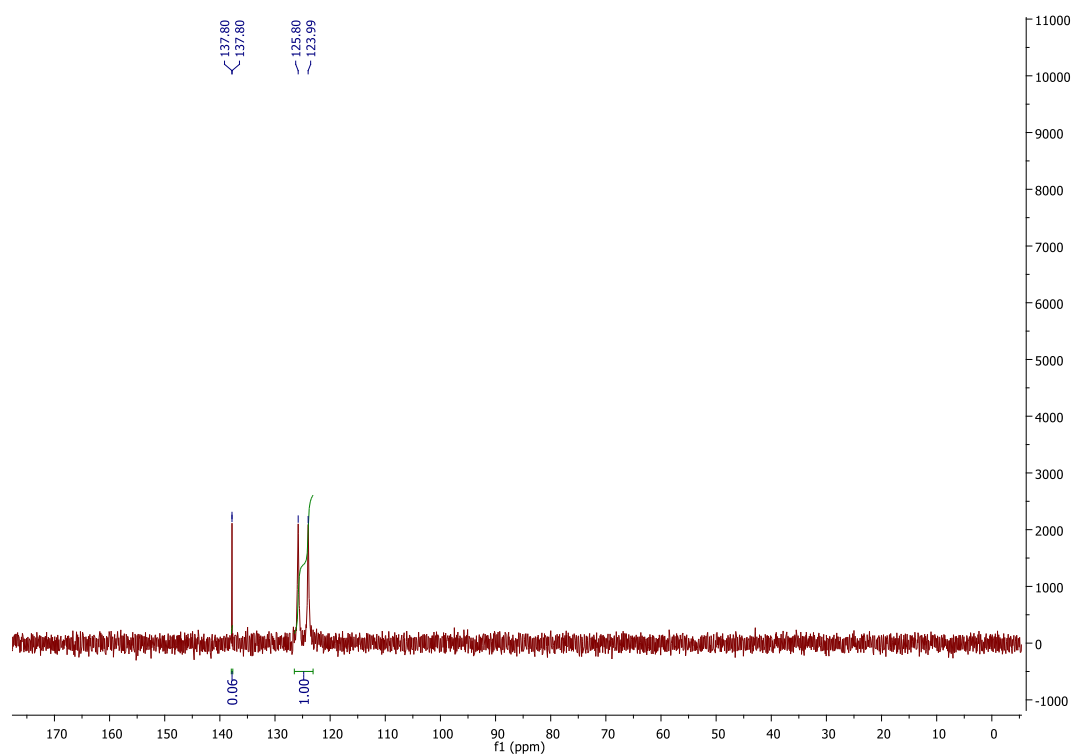

Figure S29.  $^{31}\text{P}$  NMR spectra of L2 +  $\text{Rh}(\text{CO})_2(\text{acac})$  (1:1), in toluene- $\text{d}_8$ , at  $-3\text{ }^\circ\text{C}$ .

## 2. Crystallographic data

Selected crystallographic data resulting from single crystal x-ray diffraction experiments with samples of compounds **1-4** are included in **Table S2** below. Data collections were carried out at room temperature  $T=296(2)\text{K}$ , with incident Mo  $K_{\alpha}$  radiation  $\lambda=0.71073\text{\AA}$ . Full data and refined structural model details can be found in respective CIF files deposited in the CCDC Database with numbers from 2130018 to 2130021.

**Table S2.** Selected crystallographic data for compounds **1-4**.

| <b>Compound</b>                                  | <b>1</b><br>( <i>S</i> )-BINOL-( <i>-</i> )-<br>neomenthol | <b>2</b><br>( <i>R</i> )-BINOL-( <i>+</i> )-<br>neomenthol | <b>3</b><br>( <i>S</i> )-BINOL-( <i>+</i> )-<br>neomenthol | <b>4</b><br>( <i>R</i> )-BINOL-( <i>-</i> )-<br>neomenthol |
|--------------------------------------------------|------------------------------------------------------------|------------------------------------------------------------|------------------------------------------------------------|------------------------------------------------------------|
| empirical formula                                | $\text{C}_{30}\text{H}_{32}\text{O}_2$                     | $\text{C}_{30}\text{H}_{32}\text{O}_2$                     | $\text{C}_{30}\text{H}_{32}\text{O}_2$                     | $\text{C}_{30}\text{H}_{32}\text{O}_2$                     |
| molecular mass                                   | 424.55                                                     | 424.55                                                     | 424.55                                                     | 424.55                                                     |
| crystal system                                   | monoclinic                                                 | triclinic                                                  | monoclinic                                                 | triclinic                                                  |
| space group                                      | $P2_1$                                                     | $P1$                                                       | $P2_1$                                                     | $P1$                                                       |
| $a$ (Å)                                          | 8.92(15)                                                   | 8.554(19)                                                  | 8.9225(4)                                                  | 8.669(16)                                                  |
| $b$ (Å)                                          | 24.6(4)                                                    | 10.37(2)                                                   | 24.5910(11)                                                | 10.466(19)                                                 |
| $c$ (Å)                                          | 11.03(18)                                                  | 27.70(6)                                                   | 11.0687(5)                                                 | 27.96(6)                                                   |
| $\alpha$ (°)                                     | 90                                                         | 85.20(4)                                                   | 90                                                         | 85.23(5)                                                   |
| $\beta$ (°)                                      | 94.0(3)                                                    | 85.53(3)                                                   | 93.8380(10)                                                | 85.35(4)                                                   |
| $\gamma$ (°)                                     | 90                                                         | 86.37(3)                                                   | 90                                                         | 86.37(4)                                                   |
| unit cell volume                                 | 2414(69)                                                   | 2435(9)                                                    | 2423.17(19)                                                | 2516(9)                                                    |
| $Z$                                              | 4                                                          | 4                                                          | 4                                                          | 4                                                          |
| calculated density<br>( $\text{g}/\text{cm}^3$ ) | 1.168                                                      | 1.158                                                      | 1.164                                                      | 1.121                                                      |
| absorption coefficient<br>( $\text{mm}^{-1}$ )   | 0.071                                                      | 0.071                                                      | 0.071                                                      | 0.068                                                      |
| $F(000)$                                         | 912                                                        | 912                                                        | 912                                                        | 912                                                        |
| data/restraints/parameters                       | 8528/1/580                                                 | 17445/3/1158                                               | 6939/1/580                                                 | 29425/3/1169                                               |
| goodness of fit ( $S^2$ )                        | 1.029                                                      | 1.005                                                      | 1.065                                                      | 1.022                                                      |
